# Supplementary material for: Dissecting Highly Mutagenic Processing of Complex Clustered DNA Damage in Yeast Saccharomyces cerevisiae
Source: MDPI journal article supplement (doi:10.3390/cells10092309), 2021-09-03
Supplement: s1 [file s1]

## Supplementary Information

**Table S1.** General characterization of the mutations in the MDS1-containing oligonucleotide within pRS415 plasmid after its replication in yeast.

| Sequence present at<br>MDS:    | Strain (relevant genotype) |                                                     |                            |                                  |                      |             | $\Sigma$<br>No (%) |
|--------------------------------|----------------------------|-----------------------------------------------------|----------------------------|----------------------------------|----------------------|-------------|--------------------|
|                                | wt                         | <i>ung1 ntg1</i><br><i>ntg2 ogg1</i><br><i>mag1</i> | <i>ntg1</i><br><i>ntg2</i> | <i>rad14</i><br><i>ntg1 ntg2</i> | <i>rad14</i>         | <i>rev3</i> |                    |
|                                | No (%)                     | No (%)                                              | No (%)                     | No (%)                           | No (%)               | No (%)      |                    |
| wild type <sup>a</sup>         | 43 (51)                    | 46 (58)                                             | 38 (47)                    | 28 (56)                          | 59 (64)              | 48 (66)     | 262<br>(57)        |
| <i>Single mutations:</i>       | 38 (45)                    | 23 (29)                                             | 42 (52)                    | 19 (38)                          | 28 (30)              | 24 (33)     | 174                |
| targeted                       | 31 (37)                    | 20 (25)                                             | 36 (44)                    | 15 (30)                          | 24 (26) <sup>c</sup> | 21 (29)     | (38)               |
| non-targeted                   | 7 (8)                      | 3 (4)                                               | 6 (7)                      | 4 (8)                            | 4 (4)                | 3 (4)       | 147                |
| <i>Double mutations:</i>       | 3 (4)                      | 11 (14) <sup>b</sup>                                | 1 (1)                      | 3 (6)                            | 5 (5)                | 1 (1)       | (32)               |
| <b>targeted + targeted</b>     | 2 (2)                      | 9 (11) <sup>b</sup>                                 | 1 (1)                      | 3 (6)                            | 1 (1)                | 1 (1)       | 27 (6)             |
| oG + hU                        | -                          | 2 (3)                                               | -                          | -                                | 1 (1) <sup>d</sup>   | 1 (1)       | 24 (5)             |
| oG + fU                        | 2 (2)                      | 1 (1)                                               | 1 (1)                      | 1 (2)                            | -                    | -           | 17 (4)             |
| hU + fU                        | -                          | 6 (8)                                               | -                          | 2 (4)                            | -                    | -           | 4 (1)              |
| <b>targeted + non-targeted</b> | 1 (1)                      | 2 (3)                                               | -                          | -                                | 4 (4)                | -           | 5 (1)              |
| oG + non-targeted              | -                          | 2 (3)                                               | -                          | -                                | 1 (1)                | -           | 8 (2)              |
| hU + non-targeted              | 1 (1)                      | -                                                   | -                          | -                                | 2 (2)                | -           | 7 (2)              |
| fU + non-targeted              | -                          | -                                                   | -                          | -                                | 1 (1) <sup>e</sup>   | -           | 3 (0.7)            |
|                                |                            |                                                     |                            |                                  |                      |             | 3 (0.7)            |
|                                |                            |                                                     |                            |                                  |                      |             | 1 (0.2)            |
| Total samples                  | 84                         | 80                                                  | 81                         | 50                               | 92                   | 73          | 460                |

<sup>a</sup> - sequence identical to the undamaged oligonucleotide (see Fig. 1).

<sup>b</sup> - significantly higher than observed in the wild-type strain (Fisher's Exact Test,  $p < 0.05$ ).

<sup>c</sup> - one hU-targeted mutation counted as "single" was a 4-nt deletion involving hU.

<sup>d</sup> - also contains third mutation, a 1-nt deletion adjacent to hU.

<sup>e</sup> - also contains third mutation, a 1-nt deletion adjacent to fU.

**SDS-oG**

$\Delta\Delta$   
T  
C                    T     $\Delta$     +C

5'...CTAGTCTGATCGATGACAGCAToG ACGTGCToA CTGACATGATCTCGA...3'  
3'...GATCAGACTAGCTACTGTCGTAC TGCACGA T GACTGTACTAGAGCT...5'

**SDS-hU**

5'...CTAGTCTGATCGATGACA G CATGACGTGCTACTGACATGATCTCGA...3'  
3'...GATCAGACTAGCTACTGThUGTACTGCACGATGACTGTACTAGAGCT...5'

T                    ACA    T                    +A  
TTT  
TTTTT  

A A

**SDS-fU**

5'...CTAGTCTGATCGATGACAGCATGACGTGCTACTG A CATGATCTCGA...3'  
3'...GATCAGACTAGCTACTGTCGTACTGCACGATGACfUGTACTAGAGCT...5'

T                     $\Delta$     A                    A  
AAAA

**Figure S1.** Mutation spectra of singly damaged oligonucleotides in WT strain.

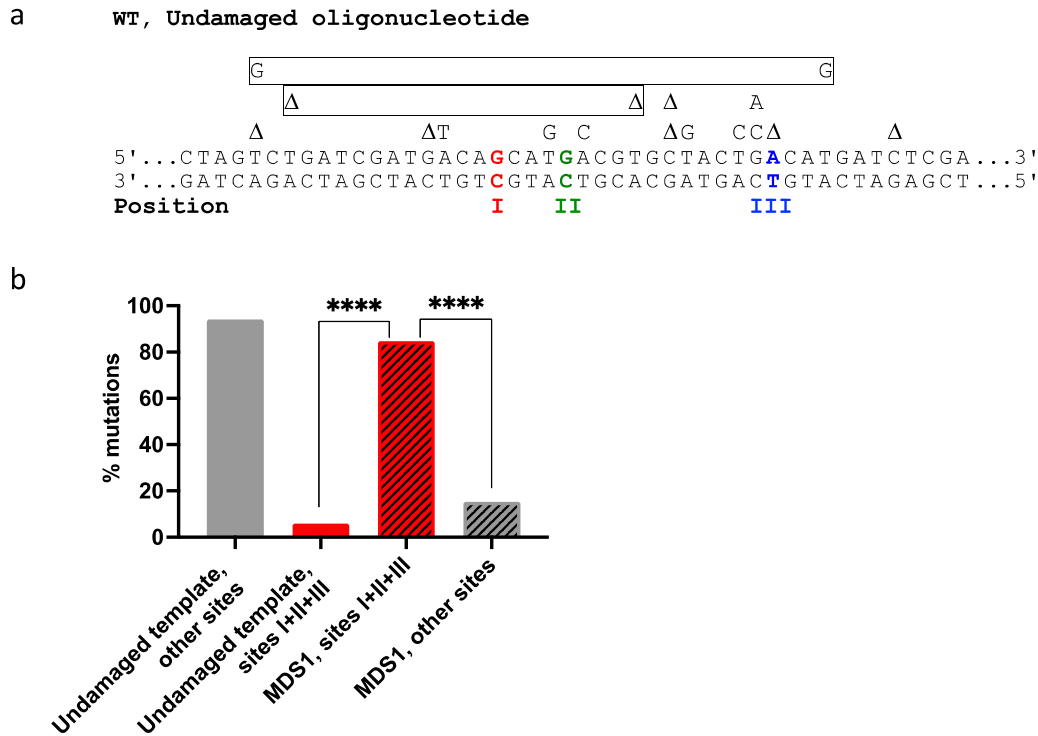

**Figure S2. a.** Mutation spectrum of undamaged oligonucleotide in WT. **b.** Vast majority of mutations in MDS1 are targeted to sites of lesion. For MDS1, data for all strains were combined: 460 samples were sequenced; 222 mutations were recovered; 188 (85%) mutations occurred at sites I+II+III and 34 (15%) mutations occurred at other positions. If mutations occurred randomly, the expected distribution of mutations within the 46-bp MDS1 oligonucleotide would be:  $222 \times 3/46 = 15$  at sites I+II+III and  $222 - 15 = 207$  at other positions, which is dramatically different from observed distribution (Fisher's exact test,  $p < 10^{-4}$ ). For undamaged template, 79 samples were sequenced; 1 (7%) mutation occurred at site III, 14 (93%) mutations occurred at sites other than I, II or III. The difference between MDS1 and undamaged oligonucleotide mutation spectra is statistically significant (Fisher's exact test,  $p < 10^{-4}$ ).

Diagram illustrating a DNA double helix structure with a mutation. The top strand (5' to 3') is CTAGTCTGATCGATGACAG CAToG AC GTGCToACTG A CATGATCTCGA... The bottom strand (3' to 5') is GATCAGACTAGCTACTGTG TGTAC TGC CGA TGACfUGTACTAGAGCT... A mutation is shown where a 'G' in the top strand is replaced by 'o' (orange) and a 'T' in the bottom strand is replaced by 'f' (blue). The diagram includes labels for bases (A, C, G, T), sugar-phosphate backbones (represented by boxes), and hydrogen bonds (represented by lines).

*htg1*, *htg2*, *MDS1*

TTTT  
ΔΔΔ  
ΔΔ  
Δ+TΔ    ΔΔ  
5'...CTAGTCTGATCGATGAC**A**G CAT**O**G ACGTGCT**O**AACTG **A**CATGATCTCGA...3'  
3'...GATCAGACTAGCTACTGT**Th**GTAC TGC CGA **T**GAC**fUG**TACTAGAGCT...5'

T  
TTTT  
TTTTTT  
TTTTTTT  
G

HO OH

AAAA  
ΔΔ

MDS1

[illegible][illegible]

**REV3, HDS1**

A T  
ΔΔΔ  
ΔΔΔ  
TTT  
TTT  
T+G Δ  
5'...CTAGTCTGATCGATGCACAC G Cato G ACGTGT ToACTG A CATGATCTCGA...3'  
3'...GATCAGACTAGCTACTGThUGTAC TGC CGA TGACfUGTACTAGAGCT...5'

T TTT  
HO OH Δ

4

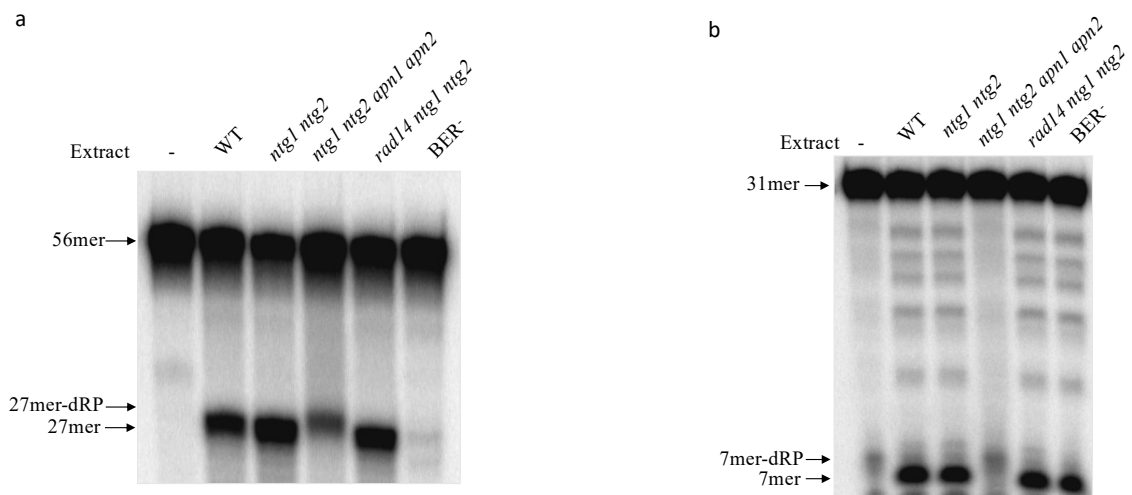

**Figure S4.** Cleavage at oG (a) or hU (b) within MDS1 by the whole cell extracts from the various yeast strains.

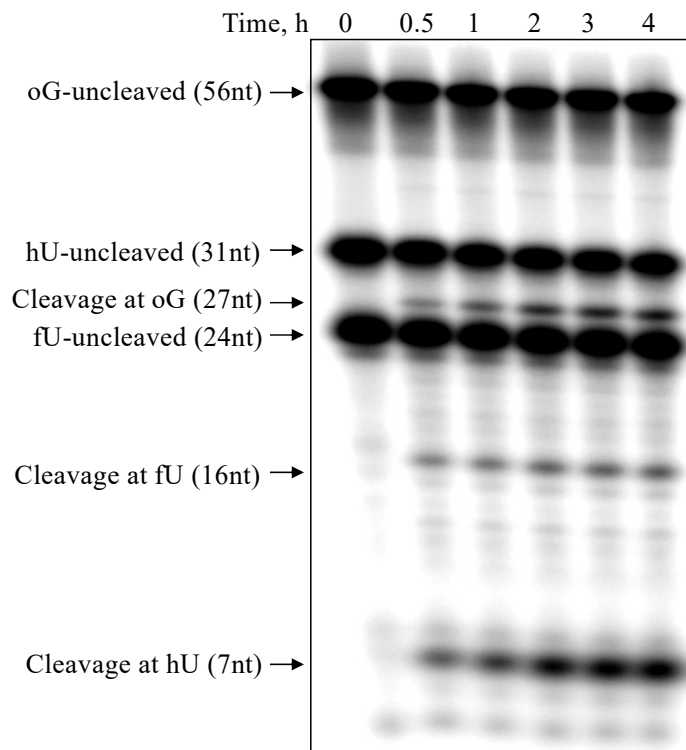

**Figure S5.** Cleavage at oG, hU, and fU within MDS1 by the whole cell extracts from wild-type strain. MDS1 duplex with labelling on 5' end of each constitutive oligonucleotide was incubated in the presence wild-type yeast whole cell extract for the indicated times and then processed as in Materials and Methods.
